# Supplementary material
Source: PubMed Central journal article supplement (PMC5582840)

## **Supplemental Data**

### **Mitochondrial calcium uniporter in *Drosophila* transfers calcium between the endoplasmic reticulum and mitochondria in oxidative stress-induced cell death**

**Sekyu Choi, Xianglan Quan, Sunhoe Bang, Heesuk Yoo, Jiyoung Kim, Jiwon Park, Kyu-Sang Park and Jongkyeong Chung**

## Supplementary Figure Legends

**FIGURE S1. Comparison of MCU sequences among human, mouse and *Drosophila*.** *A*, amino acid sequence alignments of *Drosophila* MCU (dMCU), human MCU (hMCU) and mouse MCU (mMCU).

**FIGURE S2. Mitochondrial localization of MTRP. Subcellular localization of MTRP in larval muscle** *A*, MTRP is green. Hoechst (blue) and ATP5a (red) were used to mark DNA and mitochondria, respectively. Genotype: *Mef-Gal4/UAS-MTRP*. Scale bar: 10  $\mu$ m.

**FIGURE S3. Cytosolic calcium changes by caffeine in *MCU<sup>52</sup>* mutant.** *A*, averaged traces (left) and the quantitative analysis (right) of  $[Ca^{2+}]_i$  signals after treatment of 10 mM caffeine from wild-type and *MCU<sup>52</sup>* mutant (n=3~4). Genotypes: *Mef>* (*Mef-Gal4/UAS-GCaMP3.T*) and *MCU<sup>52</sup>,Mef>* (*Mef-Gal4,MCU<sup>52</sup>/UAS-GCaMP3.T,MCU<sup>52</sup>*).

**FIGURE S4. Oxidative stress-induced apoptosis in *MCU<sup>52</sup>* mutant.** *A*, ROS level change was detected by DHE staining in thoraces of adult fly feeding on normal or 1% H<sub>2</sub>O<sub>2</sub> containing food for 72 hours. DHE is red. Hoechst (blue) used to mark DNA. Scale bars: 20  $\mu$ m. *B*, the proportion of apoptotic nuclei expressing the GFP reporter under control of *hid5*'*F-WT* enhancer in wild-type and *MCU<sup>52</sup>* mutant flies after treatment of 2% H<sub>2</sub>O<sub>2</sub> for 3 hours (n=5~7). *C*, the proportion of apoptotic nuclei stained with cleaved caspase-3 in wild-type and *MCU<sup>52</sup>* mutant flies after treatment of 2% H<sub>2</sub>O<sub>2</sub> for 3 hours (n=5). \*\* and \*\*\* denote p<0.01 and <0.001, respectively.

**FIGURE S5. Calcium changes by t-BuOOH.** *A*, averaged traces (left) and quantitative analyses (right) of  $[Ca^{2+}]_{mito}$  signals after 1, 10, 35 and 100 mM t-BuOOH treatment (n=4~6). Genotype: *Mef-Gal4/UAS-MTRP*. *B*, averaged traces (left) and quantitative analyses (right) of  $[Ca^{2+}]_i$  signals after 35 mM t-BuOOH treatment in control (*Mef>*) and *MCU<sup>52</sup>* flies (n=5~7).

Supplementary Figures

Figure S1

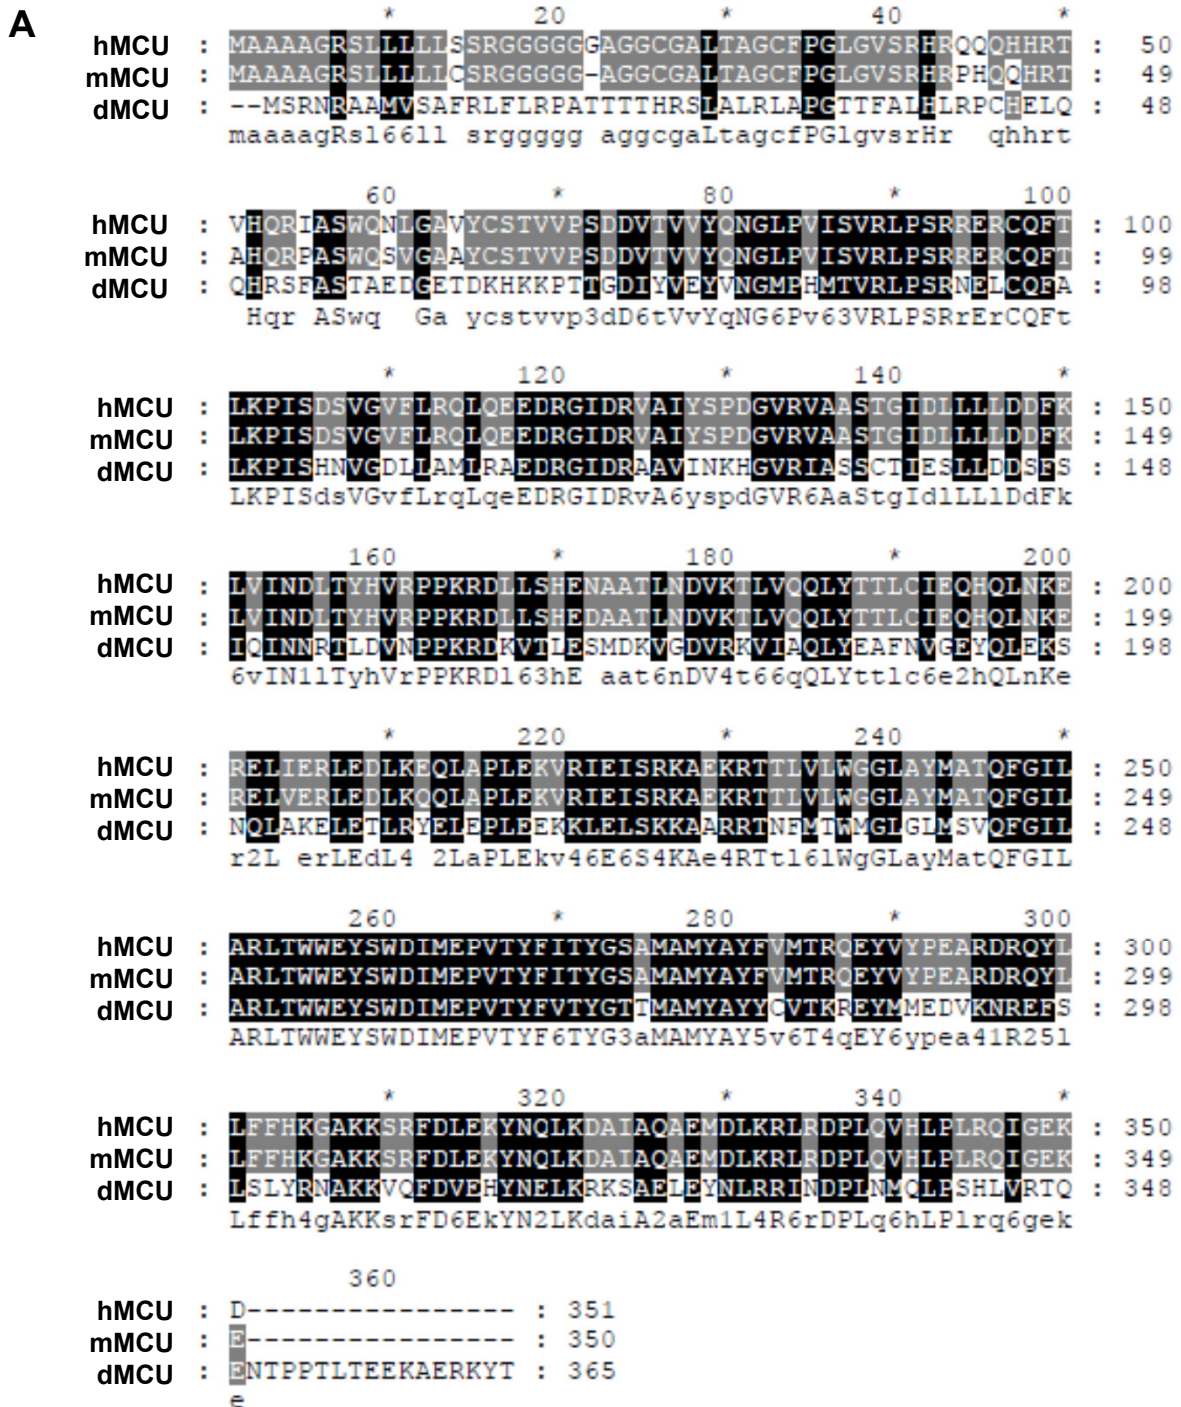

# Figure S2

A

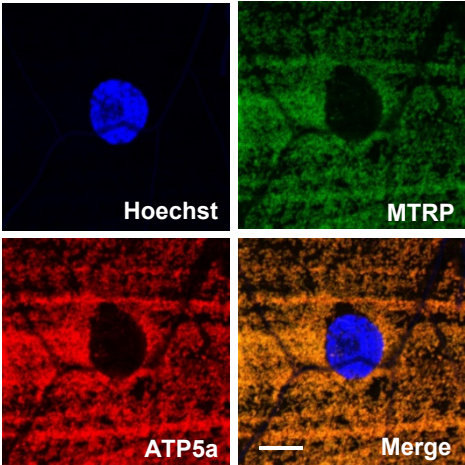

Figure S3

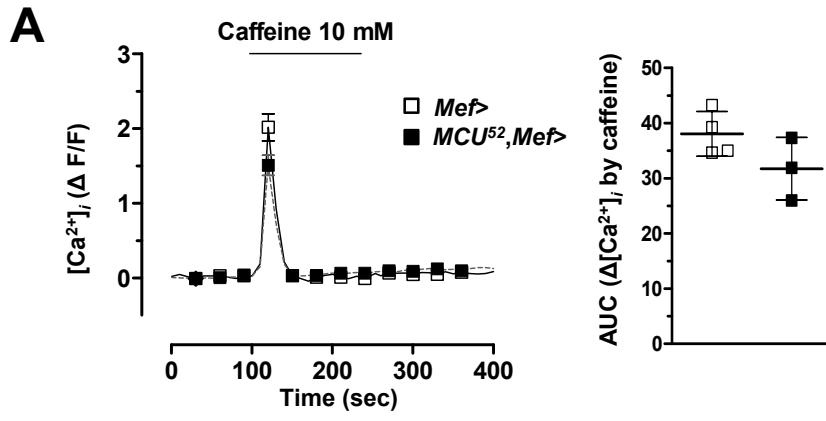

Figure S4

A

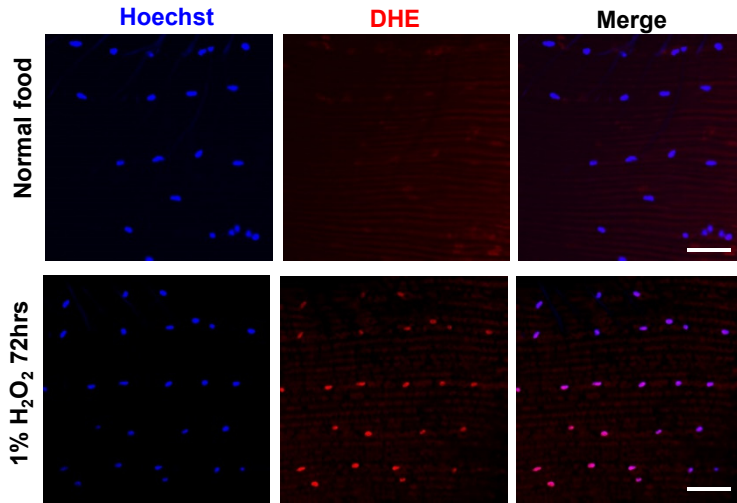

B

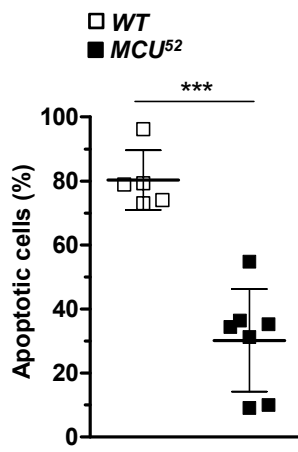

C

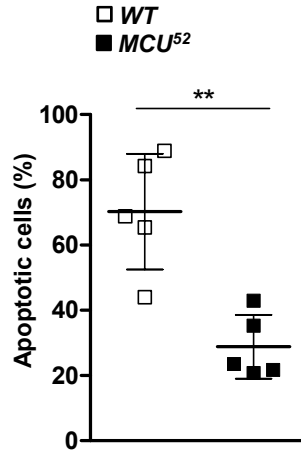

Figure S5

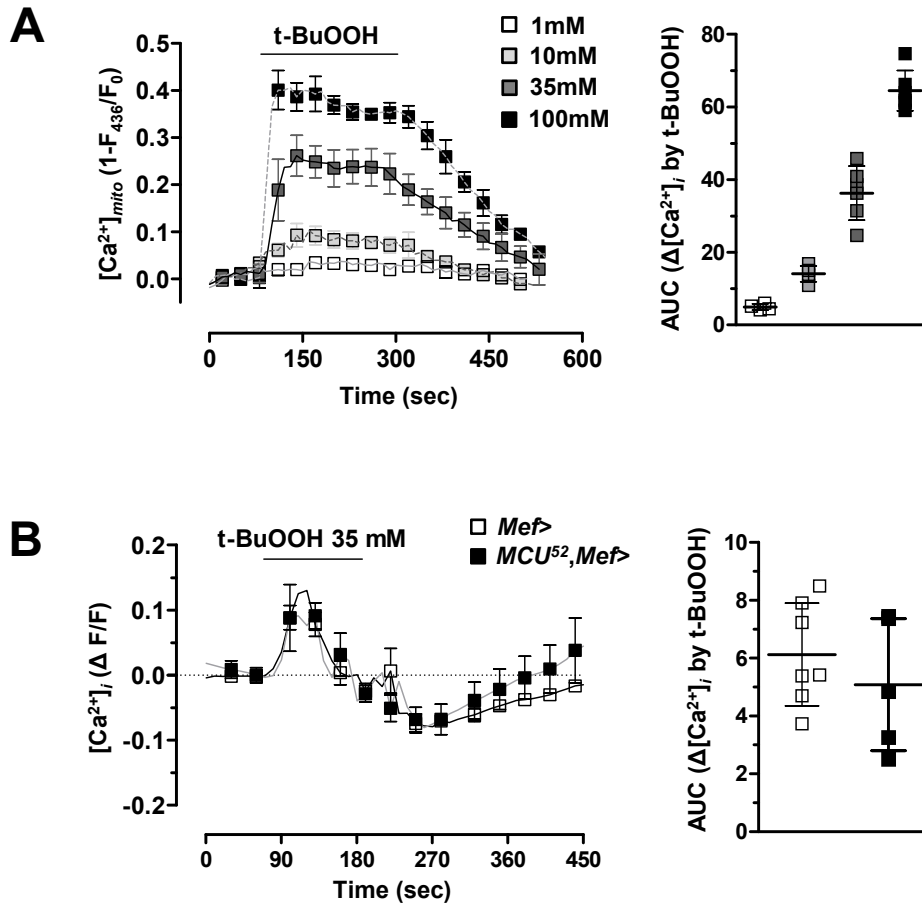

Supplement: 10.1074_M116.765578_jbc.M116.765578-1.pdf [file 10.1074_M116.765578_jbc.M116.765578-1.pdf]
